# Supplementary material for: Genome-wide analysis revealed that DZNep reduces tubulointerstitial fibrosis via down-regulation of pro-fibrotic genes
Source: PubMed Central journal article supplement (PMC5830881; doi:10.1038/s41598-018-22180-5), 2018-02-28
Supplement: 41598_2018_22180_MOESM1_ESM.pdf [file 41598_2018_22180_MOESM1_ESM.pdf]

Genome-wide analysis revealed that DZNep reduces tubulointerstitial fibrosis via down-regulation of pro-fibrotic genes.

Imari Mimura<sup>1)</sup>, Yosuke Hirakawa<sup>1)</sup>, Yasuharu Kanki<sup>2)</sup>, Ryo Nakaki<sup>3)</sup>, Yutaka Suzuki<sup>4)</sup>,  
Tetsuhiro Tanaka<sup>1)</sup>, Hiroyuki Aburatani<sup>3)</sup>, Masaomi Nangaku<sup>1)</sup>.

1) Division of Nephrology and Endocrinology, The University of Tokyo Graduate School of Medicine.

2) Isotope Science Center, The University of Tokyo.

3) Division of Genome Science, Research Center for Advanced Science and Technology, The University of Tokyo.

4) Graduate School of Frontier Sciences, The University of Tokyo.

\*Corresponding authors: Masaomi Nangaku, M.D., Ph.D.,

Division of Nephrology and Endocrinology, The University of Tokyo Graduate School of Medicine, 7-3-1 Hongo, Bunkyo-ku, Tokyo, 113-8655.

Phone: +81-3-3815-5411 Fax: +81-3-5800-8860

E-mail: mnangaku-tky@umin.ac.jp

Running title: DZNep reduces renal fibrosis.

Key words: hypoxia; DZNep, tubulointerstitial fibrosis chronic kidney disease

Additional Information: No competing financial interests

Supplementary Legends.

Suppl. Table 1. List of genes in each group (Groups 1-3).

Suppl. Table 2. List of gene names shown in the Venn diagram (HK2 only, RPTEC only and commonly up-regulated under hypoxia)

Suppl. Table 3. List of primers used for qPCR.

## Suppl. Table 1.

**Group1**

|               |               |               |
|---------------|---------------|---------------|
| Sefd1         | Tpd5211       | Chst7         |
| Clic5         | Afg311        | AU021092      |
| Gss           | Ace           | Ufsp1         |
| Rufy1         | Crot          | Prkaca        |
| Zfp207        | Copz2         | Isoc2b        |
| Guk1          | 3010026O09Rik | Acp5          |
| Cd36          | Igfbp3        | Gm14393       |
| Chchd3        | Ccdc104       | Pstk          |
| Ndufb10       | Tspan13       | Casc4         |
| 1810020D17Rik | Hmger         | Mep1b         |
| Hbb-b2        | Skiv2l2       | Csnk1g2       |
| Hbb-b1        | 5730469M10Rik | Als2cr4       |
| 0610007C21Rik | C1qtnf3       | Prkag1        |
| Pth1r         | Gpihbp1       | Hba-a1        |
| Serpinf2      | Hbb-b1        | BC003331      |
| Mrpl16        | Maged1        | Hp1bp3        |
| Mtx1          | Cd55          | Slco3a1       |
| Ttpa          | Hspa14        | Aadat         |
| Akr1b10       | Fabp4         | Cd82          |
| Nckap1        | Slc16a4       | Lymr1         |
| Enpp5         | Ipp           | Acsm3         |
| Hmbs          | Necap2        | Arsg          |
| Gm10639       | Tmem30a       | Fmo5          |
| Pi4kb         | Gclc          | Spop          |
| Cyth2         | Cyp7b1        | Wfdc15b       |
| Pigx          | Mpp6          | Agps          |
| Acot1         | Esm1          | Cutc          |
| Tm9sf1        | Id1           | Entpd5        |
| Arpp19        | Nubpl         | Gm5918        |
| Uba3          | Nudt19        | Gm15137       |
| Folr1         | Scd1          | Stk16         |
| Treh          | Cyb561d2      | Mpv17l        |
| Fam58b        | Slco1a1       | 3110045C21Rik |
|               | 1810049H13Rik | Ankrd24       |
|               | Fkbp1a        | Fam190a       |

|               |         |
|---------------|---------|
| Uqcrh         | Srp9    |
| Lymr2         | Fastk   |
| Ubc           | Dnase1  |
| Chpt1         | Pole4   |
| Mrpl3         | Gm10664 |
| E130102H24Rik | Tomm40l |
| Pex11b        | Hgd     |
| Lamtor2       | Txn2    |
| Pcolce        | Gcnt1   |
| Osgepl1       | Ccdc132 |
| 2210408F21Rik |         |
| Afap111       |         |
| Cox7b         |         |
| Tdrd7         |         |
| Gyk           |         |
| Mff           |         |
| Hsd11b1       |         |
| Psmc13        |         |
| Egf           |         |
| Cd36          |         |
| Ppt2          |         |
| Dap3          |         |
| Abhd16a       |         |
| Rpl24         |         |
| Slc50a1       |         |
| 2410022L05Rik |         |
| Mers1         |         |
| 1600012H06Rik |         |
| Ccny          |         |
| RP23-3M10.11  |         |
| Afmid         |         |
| Ptpa          |         |
| Erb2ip        |         |
| Hba-a2        |         |
| Pex3          |         |
| Slc12a1       |         |

|               |               |               |
|---------------|---------------|---------------|
| <b>Group2</b> | Set           | Serpina1f     |
| Bcl2l1        | Myo1c         | 5730469M10Rik |
| Ube2g2        | Dcaf11        | Gimap4        |
| C8g           | Dohh          | Qars          |
| Ppfibp1       | Serpina1c     | Arpc4         |
| Serpina6a     | D4Wsu53e      | Usp8          |
| Ccar1         | Akr1c19       | Fbxo36        |
| Chac2         | Pop5          | Eef1d         |
| Dynll2        | Ttc33         | Hnf1a         |
| Mterfd1       | Fdps          | 1190007F08Rik |
| Erbp2ip       | Cyp4a32       | Ncoa6         |
| Sap18         | Setd3         | Vim           |
| Hagh          | Serpina1a     | 2700029M09Rik |
| Sec11c        | Tmem116       | Uqcc          |
| Gm16286       | Gpr112        | 2210408F21Rik |
| Pdcd4         | Cldn10        | Naa30         |
| Fcgr2b        | D4Ert22e      | Fam36a        |
| Slc12a1       | Trappc1       | 1810020D17Rik |
| Pcmt2         | Dcn           | Il11ra1       |
| 2810403A07Rik | Gamt          | Prpf3         |
| Sfpq          | Tardbp        | Miox          |
| Abcf2         | Sult1a1       | Osgep         |
| Fastk         | 0610037L13Rik | Rangap1       |
| Apoc3         | Folh1         | 0610007C21Rik |
| Rnf44         | Akap1         | Pth1r         |
| Gmcs          | Chuk          | Usf1          |
| Upf3a         | Tmsb4x        | Secisbp2l     |
| Hspb11        | Tsc22d3       | Psm11         |
| Mbl1          | Myo6          | Ssrp1         |
| Jmjd6         | Pigp          | Hpn           |
| Nt5dc1        | Wbp1          | 5930416I19Rik |
| Mrpl43        | Zfp467        | Abhd14a       |
| Synj2bp       | Fmr1          | Apoe          |
| Pkig          | Ftsj1         |               |
| Cbs           | Phf10         |               |
|               | Cd82          |               |

|               |           |          |
|---------------|-----------|----------|
| <b>Group3</b> | Ptbp2     | Stx16    |
| Lpar6         | Ccnl2     | Cald1    |
| Jun           | Mxra8     | Fermt2   |
| Rhob          | Sparcl1   | C1qb     |
| Slc22a12      | Anxa3     | Ifi47    |
| Thbd          | Abp1      | Rgl2     |
| Comt          | Mgp       | Gucy1a3  |
| Cd52          | Coro1a    | Cd74     |
| S100a6        | Ucp2      | Lcn2     |
| Tcirg1        | Nupr1     | ORF61    |
| Tpm4          | Bgn       | Rbpms    |
| Cnn2          | Renbp     | Tsc22d3  |
| Hmox1         | Eif4ebp1  | Fxc1     |
| Timp1         | Plat      | Mdfic    |
| Crbn          | Mak16     | Capg     |
| Bola1         | Herpud1   | Alox5ap  |
| Timp2         | Tagln     | Rpl10    |
| Rcn3          | Anxa2     | H2-Eb1   |
| Slc9a3r2      | Ccl5      | Cdh11    |
| 2010111I01Rik | Hspb8     | Il34     |
| Cxcl14        | Cdkn1c    | Sdccag3  |
| Cldn1         | Leng8     | Fcer1g   |
| Gcfc1         | Zc3h7a    | Ptprc    |
| Serping1      | Slfn2     | Col18a1  |
| Twf2          | Lum       | Icam1    |
| Pkdcc         | Wtip      | Emr1     |
| Aldh1a7       | Cxcl10    | Igj      |
| Ldb1          | Cd53      | Csda     |
| Podxl         | Emp3      | Lyz1     |
| Casp4         | H2-Aa     | Marcks   |
| Serpine2      | H2-Ab1    | Pcgf1    |
| Slamf9        | Prkrip1   | Sfrs18   |
| Nphs2         | H2-DMa    | Bcl2a1d  |
| Vim           | Wdr45     | Anxa1    |
| Vcam1         | Serpinb6a | AW112010 |
|               | Stap2     | Aimp2    |

|            |         |          |
|------------|---------|----------|
| Set        | Ifi203  | Vmp1     |
| Evi2a      | Arap1   | Tardbp   |
| Ighm       | Rpl12   | Wbscr27  |
| Tmpo       | Echdc2  | Hmgcl    |
| Lsp1       | Acin1   | Nmd3     |
| Leprot     | Gng10   | Rbm17    |
| Gm2023     | Ucp2    | Wsb1     |
| Sparc      | Tmem208 | Hdac7    |
| Clk4       | Coq6    | Ubxn6    |
| Fbxo8      | Slc5a12 | Stk11    |
| Sap25      | Preb    | Hnrpd1   |
| Mndal      | Eif4a1  | Use1     |
| Psme2      | Llg12   | Uck11    |
| Arpc3      | Cpxm1   | Pex16    |
| Pdcd6ip    | Kif12   | Stk16    |
| D19Wsu162e | Slc50a1 | Etl4     |
| Cfh        | Hyi     | Flna     |
| Tmsb4x     | Aspdh   | AI480526 |
| Acs14      | Hnrpd1  | Miox     |
| Rab8b      | Ech1    | Stab1    |
| Mrps18b    | Lhfp    | Bud31    |
| Tmbim1     | Arpc1b  | Unc93b1  |
| Tmsb10     | Efemp1  | Dcn      |
| Taz        | Gnb211  | Axl      |
| Mylk       | Use1    | Traf7    |
| Nr3c1      | Rbbp4   | Cuedc2   |
| Ranbp1     | Rpl10a  | Ccr2     |
| Fam108c    | Arpc51  | Ubxn8    |
| Cdk9       | Flna    | Parp8    |
| Mtcp1      | Trim47  | Commd6   |
| Igfbp2     | Npm1    | Tubgcp3  |
| Gm10639    | Mpv17l  | Spns2    |
| Cpped1     | Zfp40   | Papola   |
| Glis2      | Ddx26b  | Chkb     |
| Plekho1    | Adrm1   | Morf412  |
| Parp3      | Nop56   | Rnf213   |

Col3a1

Emilin1

Egfl7

Cp

H2-Q7

Neu1

Flot1

H2-Ke6

Egfl7

Psme1

H2-Q6

H2-Aa

## Suppl. Table2.

**HK2**

|            |               |           |
|------------|---------------|-----------|
| AC009299.5 | CANX          | EBP       |
| AC016739.2 | CAPN2         | EDC4      |
| ACAT2      | CCND3         | EIF4G2    |
| ACOT7      | CCT2          | ELF3      |
| ACSS2      | CCT6A         | ENO2      |
| ACTR3      | CDC42EP3      | EPCAM     |
| AGRN       | CDK16         | ERGIC1    |
| AHNAK      | CDK2AP2       | ESYT1     |
| AHNAK2     | CDV3          | FADS1     |
| AIF1L      | CELF1         | FAM213A   |
| AKR1B1     | CHD3          | FAM57A    |
| AMOTL2     | CHMP3         | FAM65A    |
| ANKLE2     | CHRDL1        | FANCA     |
| ANKRD10    | CLDN1         | FARP1     |
| ANP32B     | CLDN4         | FASN      |
| ANXA3      | CLU           | FAXC      |
| ARF4       | CNIH4         | FBXO2     |
| ARHGEF40   | COL4A1        | FDFT1     |
| ARL6IP1    | COL4A2        | FDPS      |
| ARPC5      | COL7A1        | FGB       |
| ASF1B      | COL8A1        | FKBP9     |
| ATIC       | CRIM1         | FLII      |
| ATP11A     | CRTAP         | FLNC      |
| ATP1B1     | CTA-276O3.4   | FLOT1     |
| ATP2A2     | CTD-2116N17.1 | FUS       |
| ATXN2L     | CTPS1         | FXVD2     |
| BIRC7      | CYB5B         | GABARAPL1 |
| BNIP3      | DDX5          | GALE      |
| BNIP3P1    | DEGS1         | GATAD2A   |
| C11orf31   | DERA          | GLS       |
| C12orf75   | DERL2         | GNB1      |
| C7orf50    | DHCR24        | GOT1      |
| CACYBPP2   | DNM1          | GPC4      |
| CALM1      | DNMT1         | GPRC5A    |
|            | DUSP1         | GUCD1     |
|            | DYNLT1        | H2AFY     |

|            |           |             |
|------------|-----------|-------------|
| H3F3AP4    | ITGB1BP1  | MARVELD1    |
| HAVCR1     | ITGB3     | MAT2A       |
| HBEGF      | JUND      | MCM3        |
| HDAC2      | KDELC1    | Metazoa_SRP |
| HIATL1     | KIAA1191  | MFI2        |
| HK1        | KIFC1     | MGLL        |
| HMGA1      | KLC1      | MGMT        |
| HMGB1P5    | KPNA2     | MICAL2      |
| HMGB2      | KPNB1     | MICB        |
| HMGNI1P38  | KRT80     | MMAB        |
| HMGNI2     | LAMA5     | MMP14       |
| HMGNI2P5   | LAMC1     | MMP24       |
| HNF1B      | LDHA      | MOV10       |
| HNRNPA1P48 | LDHAP4    | MPC2        |
| HNRNPA2B1  | LDLR      | MPZL1       |
| HNRNPAB    | LEMD2     | MSANTD3     |
| HNRNPD     | LEPROT    | MSMO1       |
| HNRNPDL    | LGALS1    | MT1F        |
| HNRNPH1    | LHX1      | MTCH2       |
| HNRNPM     | LIF       | MTHFD1      |
| HNRNPU     | LIMK1     | MTND1P23    |
| HNRNPUP1   | LINC00958 | MT-ND5      |
| HP1BP3     | LITAF     | MT-ND6      |
| HSP90AA1   | LMCD1     | MVD         |
| HSP90B1    | LMNB2     | MXRA7       |
| HSPB8      | LOXL1     | MYBL2       |
| HSPD1      | LPCAT1    | MYO19       |
| HSPG2      | LRRC61    | MYO1E       |
| HTATIP2    | LRRC8A    | MYOF        |
| HYI        | LRRN4     | NAP1L1      |
| IDH2       | LSM14B    | NAP1L4      |
| IGF2R      | LSR       | NBL1        |
| IL11       | LSS       | NEK6        |
| IMPA2      | LTBP4     | NES         |
| IMPDH2     | MAD1L1    | NFE2L1      |
| INSIG1     | MAPRE1    | NFKBIA      |

|          |               |           |
|----------|---------------|-----------|
| NNMT     | PSMA3         | SHMT1     |
| NPM1     | PSMD11        | SLC38A2   |
| NRM      | PTGES3        | SLCO4A1   |
| NUAK2    | PTGES3P1      | SNHG6     |
| NUDT21   | PTMS          | SPCS3     |
| NXN      | PTPRF         | SPTAN1    |
| OCIAD1   | PXMP2         | SPTBN1    |
| OCIAD2   | RBBP4         | SQLE      |
| P3H2     | RBCK1         | SREBF2    |
| PABPC1   | RBMX          | SRSF1     |
| PABPC4   | RBP7          | SRSF3     |
| PALLD    | RHOD          | SRSF5     |
| PAM      | RHOF          | SRSF6     |
| PAX8     | RN7SL1        | SRSF7     |
| PCNA     | RNF4          | SSC4D     |
| PDZK1IP1 | RP11-252P18.1 | STAG3     |
| PFKP     | RP11-312J18.5 | STAT1     |
| PFN2     | RP11-333E13.2 | STAT2     |
| PGLS     | RP11-69L16.5  | TAPBP     |
| PGM1     | RP11-982M15.2 | TARDBP    |
| PGRMC1   | RP1-241P17.4  | TBCD      |
| PHGDH    | RPA1          | TCEA3     |
| PLEC     | RPL12         | TFPI2     |
| PLEKHA2  | RPL12P4       | TGIF1     |
| PLPP2    | RPS12         | THOP1     |
| POLE     | RPS21P4       | TIMP2     |
| POLR2A   | RRAS          | TMEM139   |
| PPFIBP1  | RRM2          | TMEM14DP  |
| PPP1CB   | RTN4          | TMEM184B  |
| PPP1CC   | S100A2        | TMEM256   |
| PRDX5    | SCD           | TMEM54    |
| PRKACA   | SCDP1         | TMEM97    |
| PRKAR1A  | SEPT8         | TMEM98    |
| PRKCZ    | SEPT9         | TMPO      |
| PRRC2B   | SETP14        | TNFRSF12A |
| PSMA1    | SFPQ          | TPM4      |

TPT1  
TPT1P9  
TRA2B  
TRAM1  
TRIB3  
TRNP1  
TXNRD1  
UBAC2  
UBE2A  
UBE2D2  
UBE2D3  
UBE2MP1  
UBE2SP1  
UBE2SP2  
UFD1L  
UGCG  
UGDH  
UXS1  
VCP  
WHSC1  
WSB2  
WWC1  
WWTR1  
XRCC5  
Y\_RNA  
YWHAB  
YWHAH  
YWHAZP3  
ZDHHC7  
ZFAND3  
ZFYVE21  
ZWINT

|              |         |          |
|--------------|---------|----------|
| <b>RPTEC</b> | AES     | AP3D1    |
| A4GALT       | AGAP3   | APEH     |
| AAAS         | AGPAT1  | APH1A    |
| AACS         | AGPAT3  | APOA1BP  |
| AAMP         | AGRN    | APOBEC3C |
| AARS         | AGTRAP  | APOC1    |
| ABHD12       | AHCY    | APOE     |
| ABHD14B      | AHNAK   | APRT     |
| ABL1         | AIF1L   | ARF3     |
| ABR          | AIP     | ARF5     |
| AC004057.1   | AK1     | ARFGAP1  |
| AC004453.8   | AK2     | ARFIP2   |
| AC005943.2   | AKR1A1  | ARHGAP22 |
| AC007969.5   | AKR1B1  | ARHGEF1  |
| AC009133.22  | AKR7A2  | ARL16    |
| AC016734.2   | AKT1    | ARL2     |
| AC016739.2   | AKT1S1  | ARL4C    |
| AC079250.1   | AKT2    | ARL6IP4  |
| AC108479.2   | ALAS1   | ARMC6    |
| AC111200.7   | ALDOA   | ARPC1A   |
| ACADVL       | ALG3    | ARPC1B   |
| ACAT2        | ALKBH7  | ARPC4    |
| ACLY         | ALYREF  | ARRDC1   |
| ACOT7        | AMFR    | ASF1B    |
| ACSS2        | AMPD2   | ASNA1    |
| ACTR1A       | ANAPC11 | ASS1     |
| ACY1         | ANAPC15 | ATG4B    |
| ADAM15       | ANGPTL4 | ATIC     |
| ADCK4        | ANKRD52 | ATOX1    |
| ADD1         | ANPEP   | ATP2A2   |
| ADGRG1       | ANXA11  | ATP5B    |
| ADIPOR1      | AP1B1   | ATP5G1   |
| ADRM1        | AP1M1   | ATP5G2   |
| ADSL         | AP1M2   | ATP5G2P4 |
| AEBP1        | AP2A2   | ATP5G3   |
|              | AP2S1   | ATP5I    |

|          |           |               |
|----------|-----------|---------------|
| ATP5J2   | BTBD2     | CARM1         |
| ATP5L    | BTBD6     | CARS2         |
| ATP5LP2  | C11orf31  | CAST          |
| ATP6V0B  | C11orf84  | CBX6          |
| ATP6V0C  | C11orf98  | CCAR2         |
| ATP6V0D1 | C12orf10  | CCDC124       |
| ATP6V0E2 | C12orf57  | CCDC167       |
| ATP6V1F  | C12orf75  | CCM2          |
| ATXN2L   | C14orf1   | CCND3         |
| ATXN7L3  | C14orf159 | CD151         |
| AUP1     | C16orf13  | CD276         |
| AURKAIP1 | C17orf62  | CD2BP2        |
| AURKB    | C17orf89  | CD40          |
| B4GALT2  | C19orf24  | CD44          |
| B4GALT7  | C19orf33  | CD63          |
| B9D1     | C19orf48  | CD70          |
| BABAM1   | C19orf60  | CD99          |
| BACE2    | C1orf122  | CDC20         |
| BAD      | C1orf43   | CDC34         |
| BAG6     | C1QBP     | CDC42EP1      |
| BANF1    | C20orf24  | CDCA3         |
| BAX      | C21orf33  | CDCP1         |
| BCAP31   | C3        | CDH6          |
| BCL2L1   | C6orf1    | CDIP1         |
| BCL7B    | C7orf49   | CDK16         |
| BCL7C    | C7orf50   | CDK2AP2       |
| BID      | C9orf69   | CDK4          |
| BIRC5    | CALM3     | CDK9          |
| BLOC1S1  | CALR      | CDKN1A        |
| BLVRB    | CANX      | CDKN2A        |
| BOK      | CAPG      | CENPM         |
| BOLA2B   | CAPN1     | CERCAM        |
| BOP1     | CAPN2     | CERS2         |
| BRMS1    | CAPNS1    | CFL1          |
| BSG      | CARD19    | CH507-513H4.6 |
| BST2     | CARHSP1   | CH507-9B2.3   |

|         |                |          |
|---------|----------------|----------|
| CHCHD10 | COPS6          | CUEDC1   |
| CHCHD2  | COPZ1          | CYB561A3 |
| CHCHD5  | COQ9           | CYBA     |
| CHKB    | CORO1B         | CYC1     |
| CHMP1A  | COTL1          | CYP27A1  |
| CHMP3   | COX14          | CYS1     |
| CHPF    | COX17          | CYTH2    |
| CHURC1  | COX4I1         | DALRD3   |
| CIAO1   | COX5A          | DANCR    |
| CIB1    | COX6B1         | DAP      |
| CISD3   | COX7A2         | DAPK3    |
| CKAP4   | COX7A2L        | DAZAP1   |
| CKLF    | COX7B          | DBI      |
| CKS2    | COX8A          | DBNDD1   |
| CLCN7   | CPNE2          | DBNDD2   |
| CLDN4   | CPSF3L         | DCTN2    |
| CLIC1   | CRAT           | DCTN3    |
| CLK3    | CREB3          | DCTPP1   |
| CLPTM1L | CRIP1          | DDA1     |
| CLTA    | CRIP2          | DDAH2    |
| CLTB    | CRLS1          | DDB1     |
| CLU     | CRTAP          | DDOST    |
| CMC2    | CRYAB          | DDX39A   |
| CMTM3   | CS             | DDX54    |
| CNIH4   | CSK            | DEAF1    |
| CNN2    | CSNK1G2        | DESI1    |
| CNP     | CSNK2B         | DGCR6L   |
| CNPY2   | CTA-276O3.4    | DGUOK    |
| CNPY3   | CTB-33G10.1    | DHCR24   |
| COA3    | CTB-63M22.1    | DHCR7    |
| COASY   | CTBP1          | DHPS     |
| COL18A1 | CTC-260E6.2    | DHX30    |
| COMMD4  | CTC-575D19.1   | DMKN     |
| COMMD5  | CTD-2192J16.15 | DMTN     |
| COMTD1  | CTD-2270N23.1  | DNAAF5   |
| COPE    | CTHRC1         | DNAJA3   |

|         |         |         |
|---------|---------|---------|
| DNAJB11 | EIF3G   | EVA1B   |
| DNAJC5  | EIF3K   | EXOSC4  |
| DNM2    | EIF4G2  | FAAP20  |
| DNPEP   | EIF5A   | FADD    |
| DNPH1   | EIF5AL1 | FADS1   |
| DNTTIP1 | EIF5AP4 | FADS2   |
| DOC2B   | EIF6    | FAHD2A  |
| DPAGT1  | ELAVL1  | FAM101B |
| DPF2    | ELF3    | FAM134A |
| DPM2    | ELOF1   | FAM213B |
| DPP3    | ELOVL1  | FAM214B |
| DRAP1   | ELP6    | FAM3A   |
| DTYMK   | EMC10   | FAM50A  |
| DUS1L   | EMC6    | FAM57A  |
| DUT     | EMD     | FAM65A  |
| DVL1    | EML3    | FAM96B  |
| E2F4    | EMP3    | FARP1   |
| EBP     | ENO1    | FARSA   |
| ECE1    | ENO1P1  | FASN    |
| ECH1    | ENSA    | FASTK   |
| ECHS1   | ENSAP2  | FAT1    |
| ECI1    | ENTPD6  | FAU     |
| EDF1    | ENY2    | FAUP1   |
| EEF1D   | EPHA2   | FBL     |
| EEF1G   | EPHB2   | FBLIM1  |
| EEF2    | EPHB4   | FBN1    |
| EFEMP2  | EPN1    | FBRSL1  |
| EFHD2   | ERBB2   | FDFT1   |
| EFTUD2  | ERCC1   | FDPS    |
| EHD1    | ERCC2   | FDX1L   |
| EHD4    | ERF     | FGFR1   |
| EIF1    | ERI3    | FGFRL1  |
| EIF3B   | ESYT1   | FIBP    |
| EIF3C   | ETFB    | FIS1    |
| EIF3CL  | ETHE1   | FKBP2   |
| EIF3FP3 | EVA1A   | FKBP4   |

|            |         |          |
|------------|---------|----------|
| FKBP8      | GCHFR   | GUCD1    |
| FKBP9      | GCSHP5  | GUK1     |
| FLAD1      | GDI1    | H2AFJ    |
| FLII       | GET4    | H2AFV    |
| FLOT1      | GFER    | H2AFX    |
| FLOT2      | GGA1    | H2AFY    |
| FLYWCH1    | GGT1    | HADHA    |
| FLYWCH2    | GIPC1   | HAGH     |
| FOSL1      | GLB1    | HAX1     |
| FPGS       | GLTSCR2 | HDGF     |
| FSCN1      | GMPPB   | HGS      |
| FSTL3      | GNAI2   | HINT1    |
| FUOM       | GNAS    | HINT2    |
| FURIN      | GNB1    | HIP1R    |
| FUS        | GNB2    | HM13     |
| FXYD2      | GNG11   | HMBS     |
| FXYD5      | GNG5    | HMG20B   |
| FXYD6      | GPAA1   | HMGA1    |
| FZR1       | GPI     | HMGA1P2  |
| G6PC3      | GPR108  | HMGA1P8  |
| GABARAP    | GPS1    | HMGN1P38 |
| GADD45GIP1 | GPS2    | HMGN2    |
| GAK        | GPT2    | HMOX2    |
| GAL3ST1    | GPX1    | HN1      |
| GALE       | GPX1P1  | HNF1B    |
| GALK1      | GPX4    | HNRNPAB  |
| GALNT14    | GRAMD1A | HNRNPD   |
| GALNT2     | GRHPR   | HNRNPH1  |
| GAMT       | GRWD1   | HNRNPU   |
| GANAB      | GSK3A   | HNRNPUL1 |
| GAPDH      | GSPT1   | HOMER3   |
| GAPDHP1    | GSS     | HOXB2    |
| GAPDHP65   | GSTP1   | HPCAL1   |
| GAPDHP72   | GTF2F1  | HRAS     |
| GAS6       | GTF3C5  | HSD17B10 |
| GATAD2A    | GTPBP2  | HSD3B7   |

|          |           |             |
|----------|-----------|-------------|
| HSP90AB1 | ISOC2     | LMNA        |
| HSP90B1  | ISYNA1    | LMNB2       |
| HSPA5    | ITGA3     | LONP1       |
| HSPB8    | ITGB1BP1  | LOXL1       |
| HSPBP1   | ITGB5     | LOXL2       |
| HSPD1    | ITPA      | LPCAT4      |
| HSPE1    | JOSD2     | LRP10       |
| HSPE1P2  | JPX_1     | LRPAP1      |
| HSPG2    | JTB       | LRRC61      |
| HYAL2    | JUND      | LRRC75A-AS1 |
| HYI      | JUP       | LRRN4       |
| HYOU1    | KCNJ15    | LSM10       |
| ICAM1    | KCNK3     | LSM2        |
| IDH2     | KCTD11    | LSM4        |
| IDH3G    | KDELR1    | LSM5        |
| IER2     | KEAP1     | LSM7        |
| IFI27L2  | KIAA0141  | LSR         |
| IFITM1   | KIAA2013  | LSS         |
| IFITM2   | KIF22     | LTBP2       |
| IFRD2    | KLHDC3    | LTBP3       |
| IGFBP2   | KPNB1     | LTBP4       |
| IGFBP6   | KRT18     | LYPLA2      |
| IGFBP7   | KRT19     | LZTR1       |
| IGSF8    | KRTCAP2   | MACF1       |
| IL32     | LAMB1     | MAEA        |
| ILK      | LAMC1     | MAF1        |
| ILVBL    | LAMTOR1   | MAGED1      |
| IMPA2    | LASP1     | MAL         |
| IMPDH1   | LDLR      | MALSU1      |
| IMPDH2   | LEMD2     | MAN2B1      |
| INF2     | LGALS1    | MAN2C1      |
| INO80E   | LIMD2     | MANF        |
| IPO4     | LIMK1     | MAP2K1      |
| IRAK1    | LINC01578 | MAP2K2      |
| IRF3     | LITAF     | MAP3K11     |
| IRF9     | LMF2      | MAP7D1      |

|          |          |         |
|----------|----------|---------|
| MAPK13   | MMP14    | MXD4    |
| MAPKAP1  | MOB3A    | MYADM   |
| MAPKAPK2 | MOSPD3   | MYBL2   |
| MAPKAPK3 | MPC2     | MYDGF   |
| MARCH2   | MPDU1    | MYL6    |
| MARS     | MPG      | MYL6B   |
| MARVELD1 | MPRIP    | MYO1C   |
| MAZ      | MPST     | MYOF    |
| MBD3     | MRPL11   | MZT2A   |
| MBOAT7   | MRPL12   | MZT2B   |
| MCM4     | MRPL14   | NAA10   |
| MCM5     | MRPL17   | NACC1   |
| MCM7     | MRPL2    | NADSYN1 |
| MCRS1    | MRPL21   | NAGLU   |
| MCTS1    | MRPL23   | NANS    |
| MDH2     | MRPL28   | NAP1L1  |
| MDK      | MRPL4    | NAPA    |
| MED25    | MRPL52   | NARF    |
| METRNL   | MRPS11   | NBL1    |
| MEX3D    | MRPS16   | NCLN    |
| MFAP2    | MRPS18A  | NCS1    |
| MFSD10   | MRPS6    | NCSTN   |
| MFSD12   | MRTO4    | NDUFA1  |
| MGAT4B   | MT1F     | NDUFA10 |
| MGLL     | MT1G     | NDUFA11 |
| MGMT     | MTA1     | NDUFA13 |
| MGST3    | MTA2     | NDUFA3  |
| MICALL1  | MT-ATP6  | NDUFA7  |
| MIF      | MTATP6P1 | NDUFA8  |
| MINOS1   | MTCH1    | NDUFB1  |
| MIR210HG | MTCH2    | NDUFB10 |
| MKNK2    | MT-CO2   | NDUFB11 |
| MLEC     | MTG1     | NDUFB2  |
| MLF2     | MVD      | NDUFB3  |
| MLPH     | MVK      | NDUFB7  |
| MMAB     | MVP      | NDUFB8  |

|          |          |          |
|----------|----------|----------|
| NDUFB9   | NT5E     | PAX8     |
| NDUFC2   | NTMT1    | PCBD1    |
| NDUFS5   | NUBP2    | PCBP2    |
| NDUFS6   | NUDC     | PCBP4    |
| NDUFS8   | NUDCD3   | PCCB     |
| NDUFV1   | NUDT1    | PCDHGC3  |
| NEDD8    | NUDT14   | PCK2     |
| NEFL     | NUDT16L1 | PCYT2    |
| NEK6     | NUDT22   | PDAP1    |
| NELFB    | NUTF2    | PDCD2    |
| NELFCD   | NXN      | PDGFB    |
| NENF     | OAZ1     | PDIA4    |
| NEU1     | OAZ2     | PDLIM4   |
| NF2      | OBSL1    | PDLIM7   |
| NFE2L1   | OCIAD2   | PDXK     |
| NHP2     | OGDH     | PDZK1IP1 |
| NHP2P1   | ORAI2    | PEF1     |
| NIPSNAP1 | ORAI3    | PEMT     |
| NKIRAS2  | ORMDL3   | PEPD     |
| NME1     | OXLD1    | PEX10    |
| NME2     | P3H3     | PFDN2    |
| NME2P1   | P3H4     | PFDN5    |
| NME4     | P4HB     | PFDN6    |
| NMT1     | PA2G4    | PFKP     |
| NNMT     | PA2G4P4  | PFN1     |
| NOC2L    | PABPC1   | PFN1P1   |
| NOMO2    | PABPC4   | PFN2     |
| NOSIP    | PABPN1   | PGAM5    |
| NPDC1    | PACS1    | PGD      |
| NPLOC4   | PACS2    | PGLS     |
| NPM3     | PADI2    | PGM1     |
| NR2F6    | PAFAH1B3 | PHB      |
| NRBP1    | PAM      | PHB2     |
| NRM      | PARP10   | PHC2     |
| NRSN2    | PARVA    | PHF19    |
| NT5DC2   | PARVB    | PHF23    |

|         |            |          |
|---------|------------|----------|
| PHF5A   | POLD4      | PRR13    |
| PHGDH   | POLDIP3    | PRRC2A   |
| PHLDA2  | POLE4      | PRRC2B   |
| PHPT1   | POLR1D     | PSENE1   |
| PIEZO1  | POLR2A     | PSMA7    |
| PIGQ    | POLR2E     | PSMB10   |
| PIGT    | POLR2J     | PSMB3    |
| PIH1D1  | POMGNT1    | PSMB4    |
| PIK3R2  | POMP       | PSMB6    |
| PIN1    | POP7       | PSMC3    |
| PITPNA  | PPDPF      | PSMC4    |
| PITPNM1 | PPIB       | PSMD13   |
| PKM     | PPP1CA     | PSMD2    |
| PKN1    | PPP1R11    | PSMD3    |
| PLA2G16 | PPP1R13L   | PSMD8    |
| PLAT    | PPP1R14B   | PSME1    |
| PLAU    | PPP1R14BP3 | PSME3    |
| PLAUR   | PPP2R1A    | PSMG3    |
| PLCD3   | PPP2R4     | PSPH     |
| PLEC    | PPP2R5D    | PTBP1    |
| PLEKHG3 | PPP4C      | PTGES2   |
| PLEKHJ1 | PPP5C      | PTGES3   |
| PLGRKT  | PPP6R1     | PTGES3P1 |
| PLK1    | PQBP1      | PTMS     |
| PLOD3   | PQLC1      | PTOV1    |
| PLP2    | PRDX2      | PTPMT1   |
| PLPP2   | PRDX5      | PTPRF    |
| PLPP4   | PREB       | PTPRU    |
| PLTP    | PRELID1    | PUF60    |
| PLXNB1  | PRKACA     | PVR      |
| PMM1    | PRKCDBP    | PVRL2    |
| PMPCA   | PRKCSH     | PVT1     |
| PMVK    | PRMT1      | PXN      |
| PNKP    | PRMT2      | PYCARD   |
| PNP     | PROSER2    | PYCR2    |
| PNPLA6  | PRPF19     | QARS     |

|          |               |               |
|----------|---------------|---------------|
| QPRT     | RNF167        | RP11-69L16.5  |
| R3HDM4   | RNF181        | RP11-761N21.2 |
| RAB1B    | RNF187        | RP11-778D9.4  |
| RAB34    | RNF220        | RP11-796G6.1  |
| RAB35    | RNF26         | RP11-864N7.2  |
| RAB5C    | RNF5          | RP11-982M15.2 |
| RAB8A    | RNF5P1        | RP1-278E11.3  |
| RABAC1   | RNH1          | RP13-608F4.5  |
| RABL6    | RNPEP         | RP3-340B19.2  |
| RAD23A   | RNPEPL1       | RP3-486I3.4   |
| RALY     | RNPS1         | RP5-827C21.1  |
| RANBP3   | RNPS1P1       | RPL10         |
| RANGAP1  | ROMO1         | RPL12P12      |
| RARA     | RP11-112J1.1  | RPL12P16      |
| RASSF7   | RP11-12M9.3   | RPL12P4       |
| RBCK1    | RP11-170M17.2 | RPL13         |
| RBM14    | RP11-175B9.3  | RPL13A        |
| RBM4     | RP11-252P18.1 | RPL13AP25     |
| RBM42    | RP11-270C12.3 | RPL13AP5      |
| RCC2     | RP11-289I10.2 | RPL13AP6      |
| REC8     | RP11-290L1.3  | RPL13AP7      |
| REEP5    | RP11-333E13.2 | RPL13P12      |
| RELA     | RP11-343C2.11 | RPL15         |
| RER1     | RP11-365O16.1 | RPL15P3       |
| RERE     | RP11-36C20.1  | RPL17         |
| RGL2     | RP11-371A22.1 | RPL18         |
| RGS3     | RP11-400N13.3 | RPL18A        |
| RHBDF2   | RP11-425L10.1 | RPL18AP3      |
| RHOA     | RP11-466H18.1 | RPL21P119     |
| RHOC     | RP11-475C16.1 | RPL21P75      |
| RHOF     | RP11-478C6.4  | RPL22L1       |
| RNASEH2A | RP11-492M23.2 | RPL23         |
| RNASEK   | RP11-51O6.1   | RPL24P4       |
| RNF10    | RP11-543P15.1 | RPL26         |
| RNF121   | RP11-572P18.1 | RPL26P19      |
| RNF126   | RP1-159A19.3  | RPL27         |

|             |           |              |
|-------------|-----------|--------------|
| RPL27A      | RPS11     | RPSAP12      |
| RPL28       | RPS13     | RPSAP15      |
| RPL3        | RPS14     | RPSAP18      |
| RPL30       | RPS15     | RPSAP19      |
| RPL31       | RPS15A    | RPSAP54      |
| RPL31P63    | RPS15AP1  | RPSAP58      |
| RPL32       | RPS15AP24 | RRAS         |
| RPL34       | RPS16     | RRP7A        |
| RPL34P18    | RPS17     | RTKN         |
| RPL35       | RPS18P12  | RUSC1        |
| RPL35A      | RPS18P9   | RUVBL2       |
| RPL35P2     | RPS19     | S100A10      |
| RPL35P5     | RPS2      | S100A11      |
| RPL37       | RPS20     | S100A13      |
| RPL37A      | RPS20P14  | S100A16      |
| RPL37P2     | RPS21     | S100A2       |
| RPL37P23    | RPS21P4   | S100A6       |
| RPL38       | RPS23     | SAE1         |
| RPL39       | RPS23P8   | SAMD1        |
| RPL39P3     | RPS27     | SAMD4B       |
| RPL3P4      | RPS27A    | SAP30BP      |
| RPL7A       | RPS28P7   | SAT2         |
| RPL7AP30    | RPS29     | SBF1         |
| RPL7AP6     | RPS2P46   | SC22CB-1E7.1 |
| RPL7AP66    | RPS2P5    | SCAF1        |
| RPL8        | RPS2P55   | SCAMP2       |
| RPL9P7      | RPS3      | SCAMP3       |
| RPL9P9      | RPS3AP47  | SCAMP4       |
| RPLP0       | RPS3AP6   | SCARB1       |
| RPLP0P6     | RPS5      | SCO2         |
| RPLP1       | RPS6KA4   | SCRIB        |
| RPLP2       | RPS7      | SCYL1        |
| RPP21       | RPS7P1    | SDC1         |
| RPS10       | RPS7P11   | SDHA         |
| RPS10-NUDT3 | RPS9      | SEC61G       |
| RPS10P3     | RPSA      | SELK         |

|          |          |          |
|----------|----------|----------|
| SEMA7A   | SIRPB1   | SMIM12   |
| SENP3    | SIVA1    | SMOX     |
| SEPN1    | SLC10A3  | SMTN     |
| SEPT2P1  | SLC12A4  | SMUG1    |
| SEPT9    | SLC16A3  | SND1     |
| SEPW1    | SLC1A5   | SNHG5    |
| SERF2    | SLC25A1  | SNHG6    |
| SERP1    | SLC25A10 | SNHG8    |
| SERPINA1 | SLC25A11 | SNRNP25  |
| SERPINB6 | SLC25A23 | SNRNP70  |
| SERPINH1 | SLC25A39 | SNRPA    |
| SESN2    | SLC25A6  | SNRPB    |
| SF1      | SLC25A6  | SNRPD2   |
| SF3A1    | SLC29A1  | SNRPEP4  |
| SF3A2    | SLC2A4RG | SNRPF    |
| SF3B2    | SLC35A2  | SNRPFP1  |
| SF3B3    | SLC35B2  | SNRPG    |
| SF3B4    | SLC35C2  | SNRPGP10 |
| SF3B5    | SLC35F6  | SNRPGP15 |
| SFN      | SLC37A4  | SNRPN    |
| SFXN3    | SLC39A1  | SNX17    |
| SGTA     | SLC39A13 | SNX8     |
| SH3BP2   | SLC39A4  | SORBS3   |
| SH3GL1   | SLC44A2  | SPAG7    |
| SH3GLB2  | SLC4A2   | SPINT1   |
| SHARPIN  | SLC50A1  | SPINT2   |
| SHISA5   | SLC52A2  | SPNS2    |
| SHKBP1   | SLC6A6   | SPTAN1   |
| SHMT1    | SLC7A5   | SPTBN1   |
| SHMT2    | SLCO4A1  | SQRDL    |
| SIGIRR   | SLIRP    | SQSTM1   |
| SIGLEC15 | SMAGP    | SREBF1   |
| SIGMAR1  | SMARCB1  | SREBF2   |
| SIL1     | SMARCD1  | SRM      |
| SIPA1    | SMARCD2  | SRPR     |
| SIRPA    | SMDT1    | SSH3     |

|          |          |                |
|----------|----------|----------------|
| SSNA1    | TARBP2   | TMEM129        |
| SSR4     | TBCB     | TMEM134        |
| SSU72    | TBCD     | TMEM141        |
| STAP2    | TBL3     | TMEM147        |
| STARD3   | TBRG4    | TMEM14C        |
| STEAP3   | TCEB2    | TMEM160        |
| STIM1    | TCF25    | TMEM18         |
| STIP1    | TCF3     | TMEM184B       |
| STK11    | TCIRG1   | TMEM189        |
| STMN3    | TCP1     | TMEM205        |
| STOML2   | TECR     | TMEM256        |
| STRA13   | TECRP1   | TMEM256-PLSCR3 |
| STRN4    | TFPI2    | TMEM259        |
| STUB1    | TGFB1    | TMEM51         |
| STX10    | TGIF1    | TMEM54         |
| STXBP2   | TGM2     | TMEM63B        |
| STYXL1   | THAP4    | TMEM8A         |
| SUB1     | THOC6    | TMEM9          |
| SUMF2    | THOP1    | TMSB4XP8       |
| SUMO3    | TIMM10   | TMUB1          |
| SUN1     | TIMM17B  | TNFAIP2        |
| SUN2     | TIMM50   | TNFRSF10B      |
| SURF1    | TIMP2    | TNFRSF12A      |
| SURF4    | TINAGL1  | TNFRSF6B       |
| SYDE1    | TK1      | TNIP1          |
| SYMPK    | TKFC     | TNKS1BP1       |
| SYNGR2   | TKT      | TOLLIP         |
| TACC3    | TLDC1    | TOMM40         |
| TADA3    | TM4SF1   | TOMM5          |
| TAF10    | TM7SF2   | TOMM7          |
| TAF15    | TMED1    | TP53           |
| TAF6     | TMED3    | TP53I13        |
| TAGLN    | TMEM101  | TPD52L2        |
| TAGLN2   | TMEM11   | TPGS2          |
| TAGLN2P1 | TMEM120A | TPM2           |
| TAPBP    | TMEM127  | TRABD          |

|         |         |         |
|---------|---------|---------|
| TRAF4   | TUBGCP2 | USP22   |
| TRAF7   | TUFM    | USP5    |
| TRAP1   | TUSC2   | VAMP5   |
| TRAPPC5 | TWF2    | VARS    |
| TRIB3   | TXN     | VASP    |
| TRIM28  | TXNL4A  | VAT1    |
| TRIM8   | TYMP    | VCAN    |
| TRIOBP  | TYMS    | VCP     |
| TRMT112 | U2AF1   | VEGFB   |
| TRMT2A  | U2AF1L5 | VPS25   |
| TRNP1   | U2AF2   | VPS51   |
| TRPT1   | UBA1    | VPS72   |
| TSFM    | UBA52   | WARS    |
| TSKU    | UBAC2   | WASF2   |
| TSPAN1  | UBE2A   | WBP1    |
| TSPAN14 | UBE2I   | WBP2    |
| TSPAN17 | UBE2M   | WDR18   |
| TSPAN4  | UBE2MP1 | WDR34   |
| TSPAN9  | UBE2Q1  | WDR45   |
| TSPO    | UBE2SP1 | WDR54   |
| TSR3    | UBE2SP2 | WDR74   |
| TST     | UBL5    | WDR77   |
| TSTA3   | UBTD1   | WIPI2   |
| TSTD1   | UBXN1   | WWTR1   |
| TTLL12  | UCHL1   | XBP1    |
| TTYH3   | UFD1L   | YBX3    |
| TUBA1A  | UPP1    | YIF1A   |
| TUBA1B  | UQCC2   | YIF1B   |
| TUBA1C  | UQCR11  | YKT6    |
| TUBA4A  | UQCRB   | YWHAB   |
| TUBB    | UQCRC1  | ZDHHC12 |
| TUBB2B  | UQCRQ   | ZDHHC16 |
| TUBB3   | UROD    | ZDHHC3  |
| TUBB4B  | USF1    | ZDHHC5  |
| TUBB6   | USF2    | ZDHHC7  |
| TUBBP1  | USMG5   | ZDHHC8  |

ZFAND3  
ZFAS1  
ZFPL1  
ZFYVE19  
ZFYVE21  
ZMAT5  
ZNF358  
ZNF511  
ZNF581  
ZNHIT1  
ZSWIM8  
ZYG

**Common**

|             |          |          |
|-------------|----------|----------|
| AC016739.2  | FARP1    | LGALS1   |
| ACAT2       | FASN     | LIMK1    |
| ACOT7       | FDFT1    | LITAF    |
| ACSS2       | FDPS     | LMNB2    |
| AGRN        | FKBP9    | LOXL1    |
| AHNAK       | FLII     | LRRC61   |
| AIF1L       | FLOT1    | LRRN4    |
| AKR1B1      | FUS      | LSR      |
| ASF1B       | FXVD2    | LSS      |
| ATIC        | GALE     | LTBP4    |
| ATP2A2      | GATAD2A  | MARVELD1 |
| ATXN2L      | GNB1     | MGLL     |
| C11orf31    | GUCD1    | MGMT     |
| C12orf75    | H2AFY    | MMAB     |
| C7orf50     | HMGA1    | MMP14    |
| CANX        | HMGN1P38 | MPC2     |
| CAPN2       | HMGN2    | MT1F     |
| CCND3       | HNF1B    | MTCH2    |
| CDK16       | HNRNPAB  | MVD      |
| CDK2AP2     | HNRNPD   | MYBL2    |
| CHMP3       | HNRNPH1  | MYOF     |
| CLDN4       | HNRNPU   | NAP1L1   |
| CLU         | HSP90B1  | NBL1     |
| CNIH4       | HSPB8    | NEK6     |
| CRTAP       | HSPD1    | NFE2L1   |
| CTA-276O3.4 | HSPG2    | NNMT     |
| DHCR24      | HYI      | NRM      |
| EBP         | IDH2     | NXN      |
| EIF4G2      | IMPA2    | OCIAD2   |
| ELF3        | IMPDH2   | PABPC1   |
| ESYT1       | ITGB1BP1 | PABPC4   |
| FADS1       | JUND     | PAM      |
| FAM57A      | KPNB1    | PAX8     |
| FAM65A      | LAMC1    | PDZK1IP1 |
|             | LDLR     | PFKP     |
|             | LEMD2    | PFN2     |

|               |           |
|---------------|-----------|
| PGLS          | TMEM184B  |
| PGM1          | TMEM256   |
| PHGDH         | TMEM54    |
| PLEC          | TNFRSF12A |
| PLPP2         | TRIB3     |
| POLR2A        | TRNP1     |
| PRDX5         | UBAC2     |
| PRKACA        | UBE2A     |
| PRRC2B        | UBE2MP1   |
| PTGES3        | UBE2SP1   |
| PTGES3P1      | UBE2SP2   |
| PTMS          | UFD1L     |
| PTPRF         | VCP       |
| RBCK1         | WWTR1     |
| RHOF          | YWHAB     |
| RP11-252P18.1 | ZDHHC7    |
| RP11-333E13.2 | ZFAND3    |
| RP11-69L16.5  | ZFYVE21   |
| RP11-982M15.2 |           |
| RPL12P4       |           |
| RPS21P4       |           |
| RRAS          |           |
| S100A2        |           |
| SEPT9         |           |
| SHMT1         |           |
| SLCO4A1       |           |
| SNHG6         |           |
| SPTAN1        |           |
| SPTBN1        |           |
| SREBF2        |           |
| TAPBP         |           |
| TBCD          |           |
| TFPI2         |           |
| TGIF1         |           |
| THOP1         |           |
| TIMP2         |           |

Supplementary Table 3.

| gene name     | Species |         |                           |
|---------------|---------|---------|---------------------------|
| Col3a1        | mouse   | Forward | AGCCTTCTACACCTGCTCCT      |
|               |         | Reverse | CGGATAGCCACCCATTCCTC      |
| Timp2         | mouse   | Forward | GACTTCATTGTGCCCTGGGA      |
|               |         | Reverse | TGGTGCCCATTGATGCTCTT      |
| $\beta$ Actin | mouse   | Forward | TGAGGTACTAGCCACGAGAGAG    |
|               |         | Reverse | ACACCCGCCACCAGGTAAGCA     |
| TIMP2         | human   | Forward | TCCTCTTGATAGGGTTGCCA      |
|               |         | Reverse | CGTTTTGCAATGCAGATGTA      |
| $\beta$ ACTB  | human   | Forward | AACTGGTCTCAAGTCAGTGTACAGG |
|               |         | Reverse | TCCCCCAACTTGAGATGTATGAAG  |
